# Supplementary material
Source: publisher figshare collection journal article supplement (https://karger.figshare.com/ndownloader/files/8707798)
Supplement: Supplementary file 1 [file 8707798]

**Supplementary Document**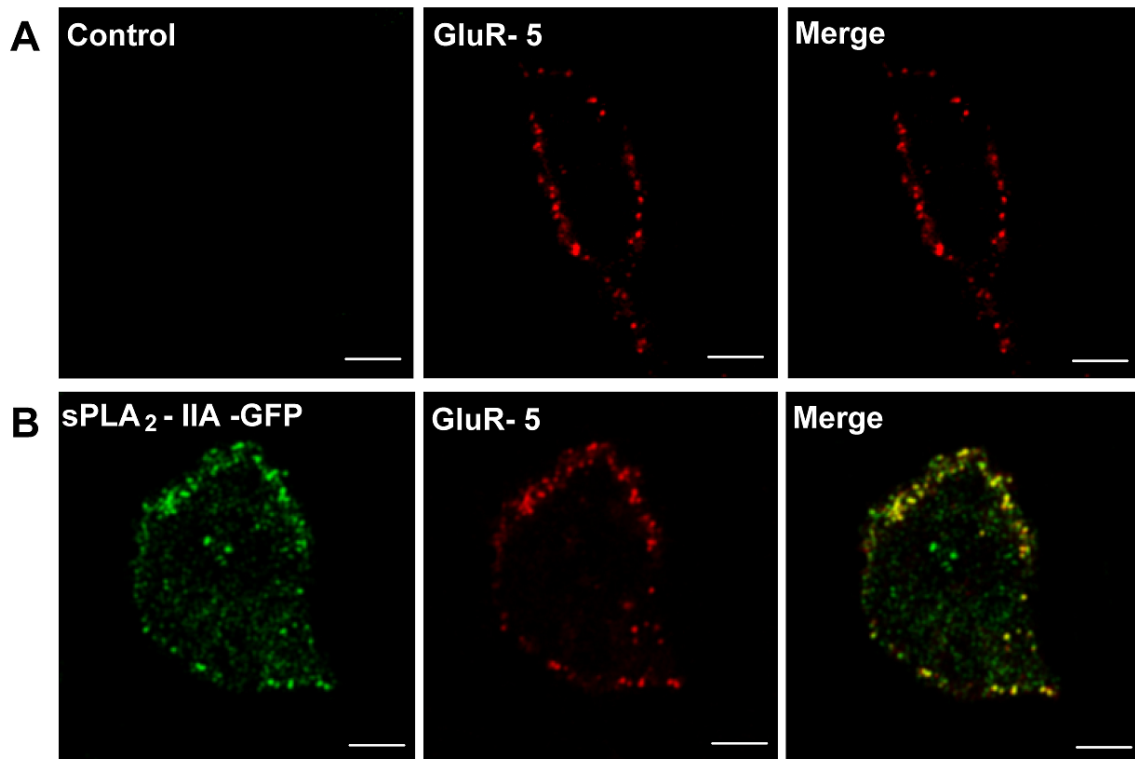**Supplementary Fig. 1.**

Immunocytochemical analysis of GluR-5 expression in SH-SY5Y cells [A] before (as control) or [B] after transfection with sPLA<sub>2</sub>-IIA-GFP (full length sPLA<sub>2</sub>-IIA). Cells were fixed with 4% formaldehyde, blocked with 1.5% bovine albumin and incubated overnight with a goat polyclonal antibody to GluR-5 (Santa Cruz Biotech, diluted 1:100), followed by incubation for 1 hr with donkey anti-goat secondary antibody conjugated with AlexaFluor 555 (Invitrogen). Cells were washed with PBS and viewed using a LSM 510 Meta confocal laser scanning microscope. GFP-tagged sPLA<sub>2</sub>-IIA molecules (full-length sPLA<sub>2</sub>-IIA) can be seen as green dots (left lane), while red color represents the immunostaining of GluR5 (middle lane), and merge of left and middle are shown at the right lane. Scale = 5  $\mu$ m.

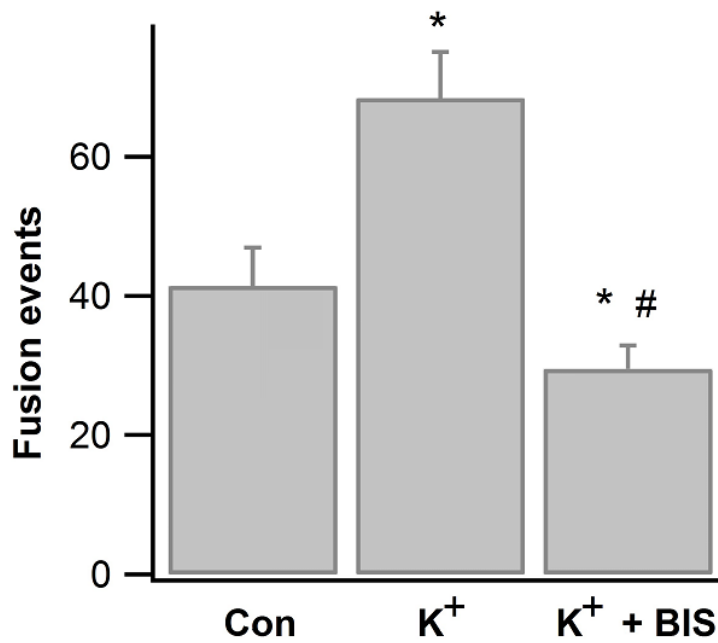

**Supplementary Fig. 2**

SH-SY5Y cells stably expressed with sPLA<sub>2</sub>-IIA-GFP (full-length sPLA<sub>2</sub>-IIA) were incubated in bath solution (150mM NaCl, 5.4mM KCL, 2mM MgCl<sub>2</sub>, 2mM CaCl<sub>2</sub>, 5mM glucose, 10mM HEPES, pH 7.4) (control, Con), or in high K<sup>+</sup> solution (37mM NaCl, 105mM KCL, 2mM MgCl<sub>2</sub>, 5mM CaCl<sub>2</sub>, 5mM glucose, 10mM HEPES, pH 7.4) without or with BIS (2.5 μM, 30 min pretreatment), followed by imaging of cells by TIRFM. The number of fusion events during a 2 min time interval was counted. Values represent mean ± SEM (5-6 cells from 3 separate experiments).

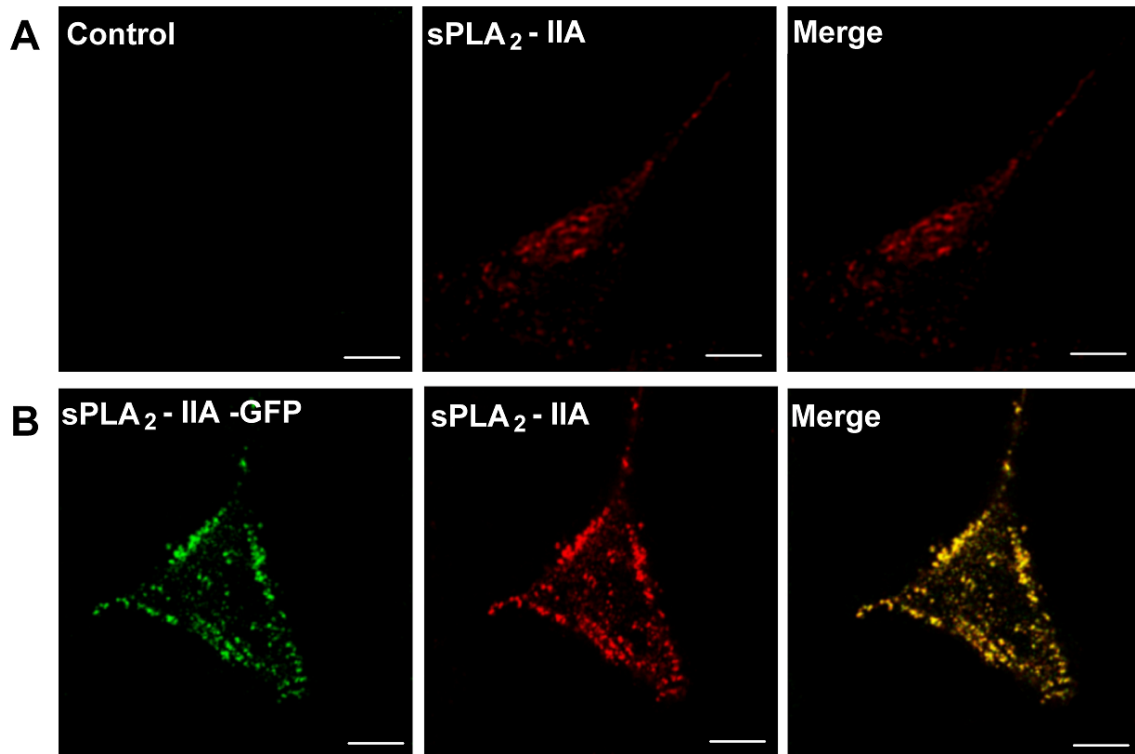

**Supplementary Fig. 3.**

Immunocytochemical analysis of sPLA<sub>2</sub>-IIA expression in SH-SY5Y cells [A] before (as control) or [B] after transfected with sPLA<sub>2</sub>-IIA-GFP (full length sPLA<sub>2</sub>-IIA). Cells were fixed with 4% formaldehyde, permeabilized with 0.1% TritonX-100, blocked with 1.5% bovine albumin and incubated overnight with a rabbit primary antibody to sPLA<sub>2</sub>-IIA (diluted 1:5000), followed by incubation for 1 hr with goat anti-rabbit secondary antibody conjugated with Atto 647 NHS (Sigma). Cells were washed with PBS and viewed using a LSM 510 Meta confocal laser scanning microscope. GFP-tagged sPLA<sub>2</sub>-IIA molecules (full-length sPLA<sub>2</sub>-IIA) can be seen as green dots (left lane), while red color represents the immunostaining of sPLA<sub>2</sub>-IIA (middle lane), and merge of left and middle are shown at the right lane. Scale = 5  $\mu$ m.
